# Supplementary material for: In vitro significance of SOCS-3 and SOCS-4 and potential mechanistic links to wound healing
Source: PubMed Central journal article supplement (PMC5532239; doi:10.1038/s41598-017-06886-6), 2017-07-27
Supplement: 41598_2017_6886_MOESM1_ESM.pdf [file 41598_2017_6886_MOESM1_ESM.pdf]

Supplementary information for SREP-17-11580A

## ***In vitro* significance of SOCS-3 and SOCS-4 and potential mechanistic links to wound healing**

**Yi Feng<sup>1#</sup>, Andrew J. Sanders<sup>1#</sup>, Liam D. Morgan<sup>1</sup>, Sioned Owen<sup>1</sup>, Fiona Ruge<sup>1,2</sup>, Keith G. Harding<sup>2</sup>,**

**\*Wen G. Jiang<sup>1</sup>**

<sup>1</sup>Cardiff China Medical Research Collaborative and <sup>2</sup>Wound Healing Research Unit, Cardiff University School of Medicine, Cardiff University, Cardiff, CF14 4XN, UK, [jiangw@cf.ac.uk](mailto:jiangw@cf.ac.uk)

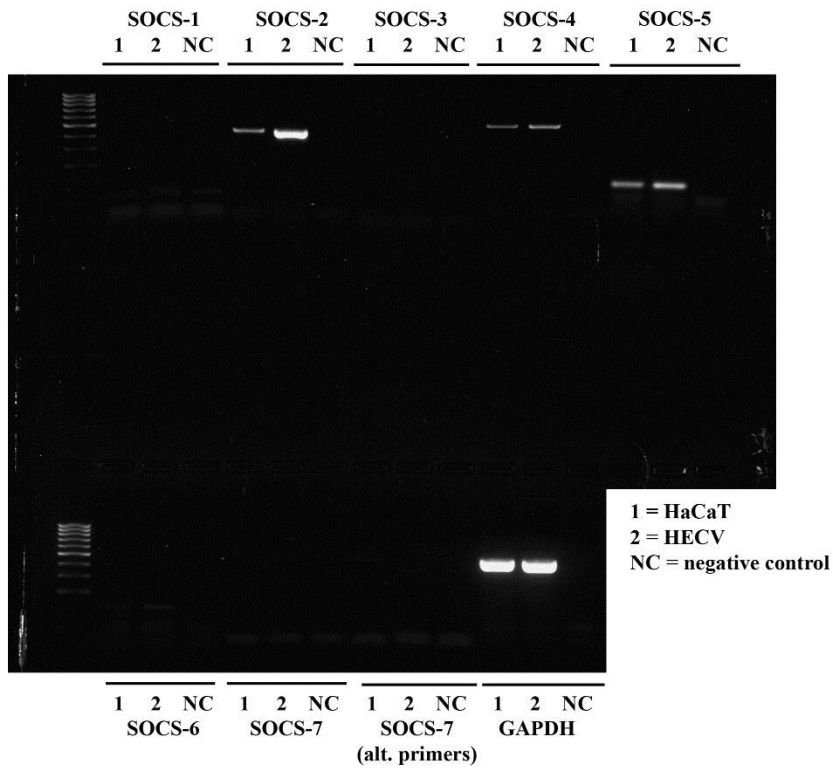

Full gel profile of composite used in figure 1a

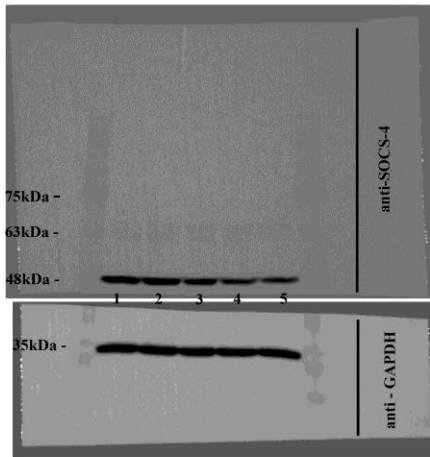

1 = HaCaT pEF6  
 2 = HaCaT SOCS-4 ribozyme 1-2  
 3 = HaCaT SOCS-4 ribozyme 1-4  
 4 = HaCaT SOCS-4 ribozyme 2-1 (used in study)  
 5 = HaCaT SOCS-4 ribozyme 2-2

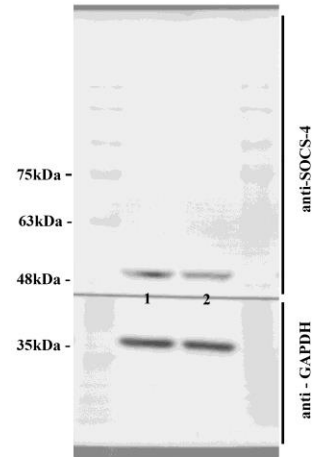

1 = HECV pEF6  
 2 = HECV ribozyme 2-1 (used in study)

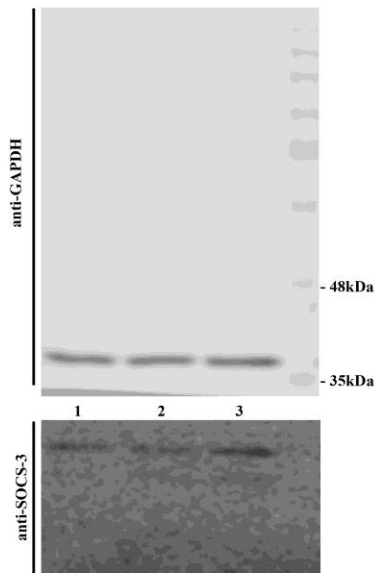

1 = HaCaT pEF6  
 2 = HaCaT SOCS-3 exp1  
 3 = HaCaT SOCS-3 exp2 (used in study)

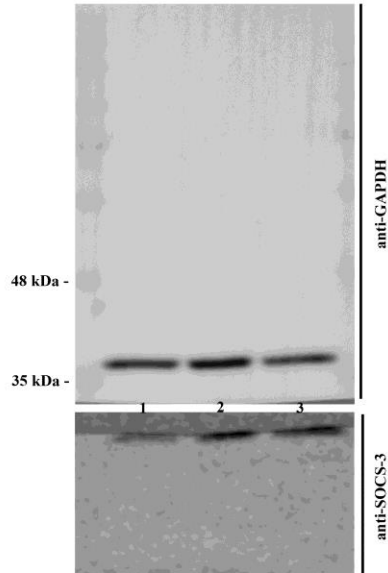

1 = HECV pEF6  
 2 = HECV SOCS-3 exp1  
 3 = HECV SOCS-3 exp2 (used in study)

Full length blots used in composites in figure 1d,e,h,i
